# Supplementary material
Source: PubMed Central journal article supplement (PMC4019131)
Supplement: JVI.03688-13_zjv999098944so1.pdf [file JVI.03688-13_zjv999098944so1.pdf]

**A**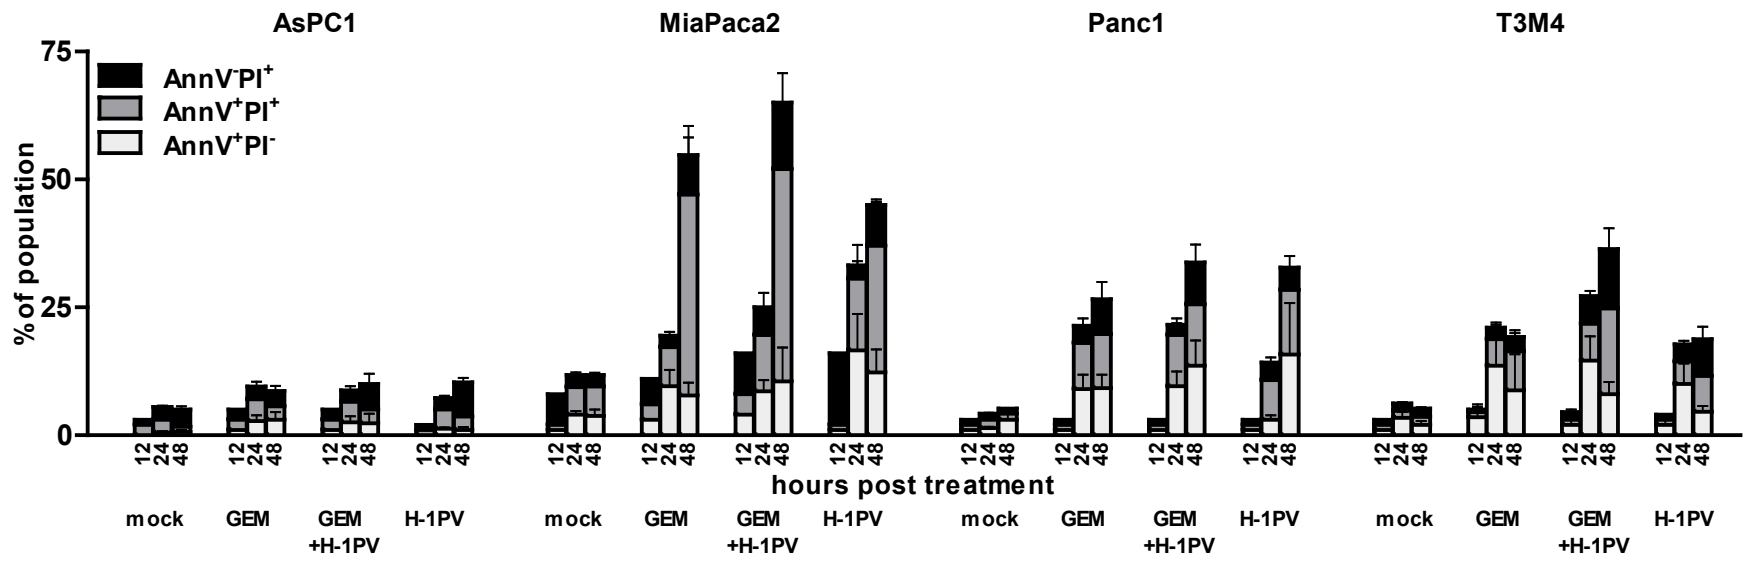**B**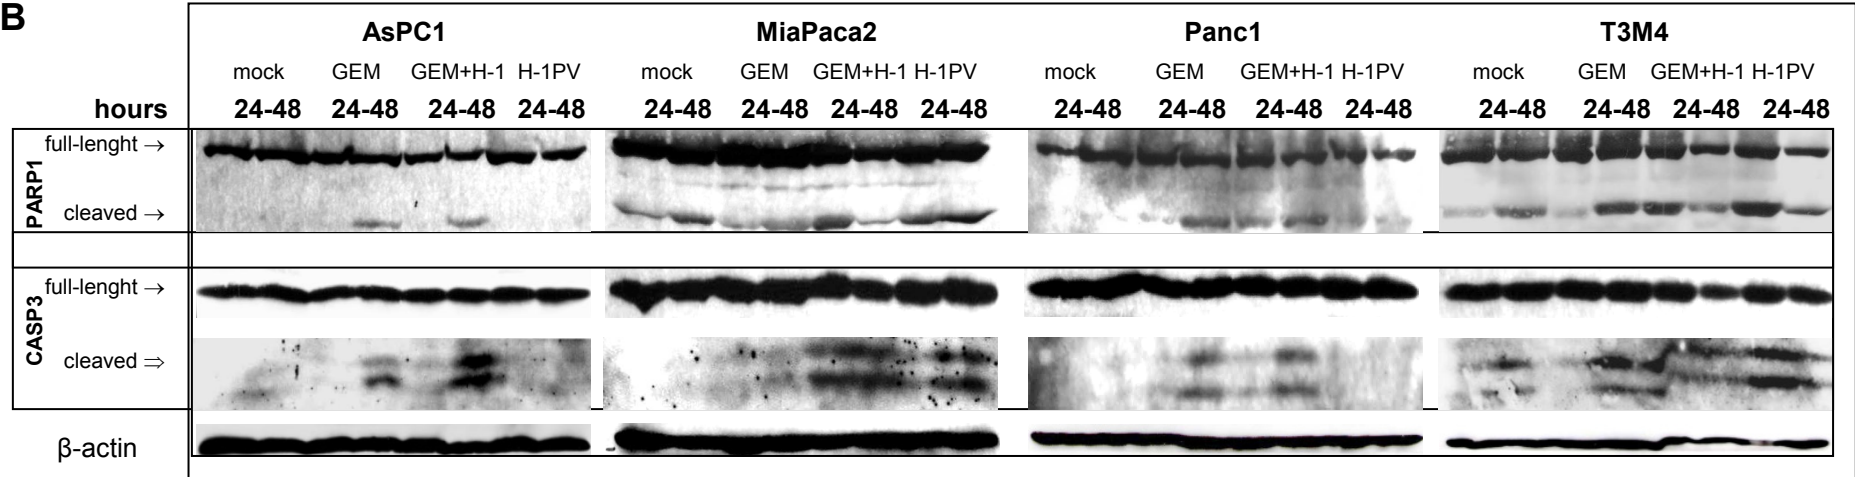

**Supplementary FIG 1. Induction of apoptosis by parvovirus (H-1PV), gemcitabine (GEM) or their combination in PDAC cells.** Pancreatic cell lines AsPC1, MiaPaca2, Panc1 and T3M4 were treated with H-1PV at MOI of 10 pfu/cell, with or without previous exposure to GEM for 12 hours at doses IC<sub>50</sub>, and harvested at 12-48 hours post treatment. **(A)** Compromised membrane integrity associated with apoptotic and necrotic phenotypes in treated cells was determined by FACS analyses of AnnexinV-Propidium Iodide (AnnV-PI) stained cells. **(B)** Molecular markers of apoptosis were assessed by Western blot analyses of whole cell lysates using anti-PARP1, CASP3, and β-actin (loading control) antibodies. Non-cleaved (full-length) and cleaved forms of the proteins are indicated. Upon densitometric analysis, cleaved/non-cleaved ratio was used for quantification of the signals, as illustrated for H-1PV-infected cells in **FIG 2F**.
